# Supplementary material for: Combined epigenetic and immunotherapy for blastic and classical mantle cell lymphoma
Source: PubMed Central journal article supplement (PMC9450988; doi:10.18632/oncotarget.28258), 2022-08-16
Supplement: oncotarget-13-28258-s001.pdf [file oncotarget-13-28258-s001.pdf]

# Combined epigenetic and immunotherapy for blastic and classical mantle cell lymphoma

## SUPPLEMENTARY MATERIALS

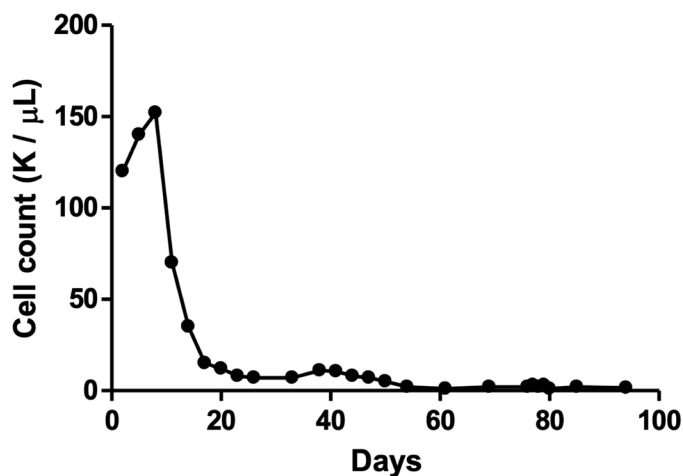

**Supplementary Figure 1: Representative falling MCL patient WBC count during SCR therapy.** Y axis in thousands of cells per microliter. Graph is representative of all patients on trial who showed a similar rapid decrease in cell counts. A single plot is shown for simplicity.

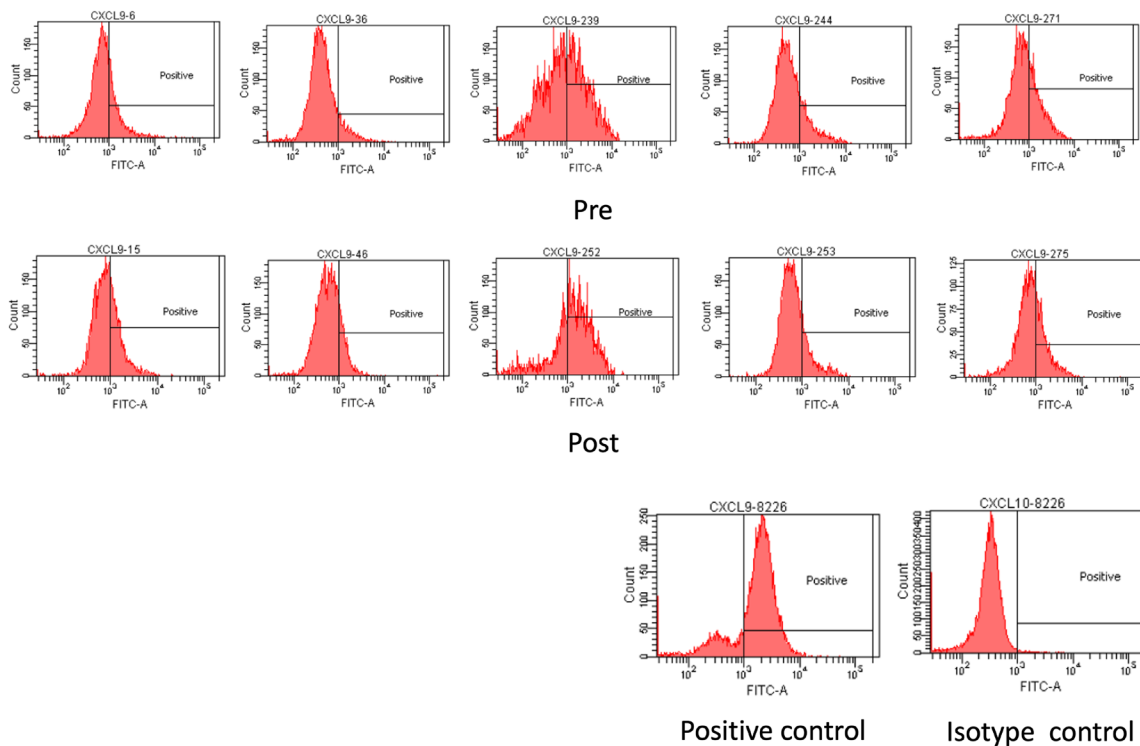

**Supplementary Figure 2: CXCL9 expression level of patient samples.**

**Supplementary Table 1: Patient and disease characteristics**

| Patient | Age at First Dx | Relapse Yes = 1, No = 0 | Stage | Blastic | Immunophenotype     | Translocation                                       | Ki67 (%) | Blood | Marrow | Lymph | Spleen | Other involved site | WBC (K/ $\mu$ L) | HGB (g/dL) | PLT (K/ $\mu$ L) | PMN (K/ $\mu$ L) | Lymphs (K/ $\mu$ L) | LDH (U/L) | B2M (g/dL) |
|---------|-----------------|-------------------------|-------|---------|---------------------|-----------------------------------------------------|----------|-------|--------|-------|--------|---------------------|------------------|------------|------------------|------------------|---------------------|-----------|------------|
| 1       | 63              | 0                       | IV    | 1       | CD5+CD20+           | t(11;14)                                            | 40-50    | 1     | 1      | 1     | 1      | -                   | 6.9              | 10.8       | 69               | 5                | 1.2                 | 772       | 6.74       |
| 2       | 79              | 0                       | IV    | 1       | CD5+CD20+CD23+      | Not done                                            | 20       | 1     | 1      | 1     | 1      | Scrotum             | 13.3             | 11.9       | 147              | 2.9              | 9.7                 | 986       | 11.4       |
| 3       | 66              | 0                       | IV    | 1       | CD5+CD19+CD20+      | Not done                                            | 5        | 1     | 1      | 1     | 1      | -                   | 12.7             | 12.6       | 227              | 8.7              | 2.2                 | 1118      | 12.8       |
| 4       | 55              | 0                       | IV    | 1       | CD5+CD19+CD20+CD23+ | t(11;14)<br>TP53del<br>13q14del<br>MYBdel<br>ATMdel | 30       | 1     | 1      | 1     | 1      | -                   | 12.07            | 13.2       | 152              | 3.26             | 7.85                | 605       | 4.08       |
| 5       | 79              | 1                       | IV    | 1       | CD5+CD20+           | t(11;14)                                            | 15-20    | 1     | 1      | 1     | 1      | Pleura              | 13.7             | 11.6       | 357              | 6.7              | 6                   | 1579      | 7.4        |
| 6       | 57              | 0                       | IV    | 1       | CD19+CD20+          | t(11;14)<br>P53del                                  | N/A      | 1     | 1      | 1     | 1      | Tonsils             | 18.1             | 10         | 110              | 3.96             | 13.69               | 626       | 3.93       |
| 7       | 55              | 1                       | IV    | 1       | CD20+               | Not done                                            | 20-30    | 0     | 1      | 1     | 1      | Cavernous Sinus/CSF | 20.3             | 13         | 398              | 17.23            | 0.51                | 760       | 2.72       |
| 8       | 67              | 0                       | IV    | 1       | CD5+CD20+           | t(11;14)                                            | 20-30    | 1     | 1      | 1     | 1      | -                   | 32.7             | 7.9        | 23               | 3.3              | 29.4                | 785       | 7.04       |
| 9       | 49              | 0                       | IV    | 1       | CD5+CD20+CD22+CD38+ | t(11;14)                                            | 30-40    | 1     | 1      | 1     | 1      | Tongue, Nasopharynx | 10.4             | 14.6       | 192              | 8.1              | 0.6                 | 626       | 3.54       |
| 10      | 62              | 0                       | IV    | 1       | CD19+CD20+CD23      | t(11;14)                                            | 5        | 1     | 1      | 1     | 1      | -                   | 34.9             | 11.1       | 144              | 4.5              | 30.1                | 418       | 4.14       |
| 11      | 66              | 0                       | IV    | 1       | CD5+CD19+CD20+      | t(11;14)                                            | 10       | 1     | 1      | 1     | 1      | -                   | 23.3             | 9          | 52               | 8.4              | 7                   | 730       | 5.97       |
| 12      | 59              | 1                       | IV    | 1       | CD5+CD19+CD20+CD22+ | Not done                                            | N/A      | 1     | 1      | 1     | 1      | Colon               | 4.1              | 14.9       | 140              | 2.1              | 1.2                 | 1021      | 1.86       |
| 13      | 52              | 1                       | IV    | 1       | CD5+CD19+CD20+CD22+ | t(11;14)                                            | N/A      | 1     | 1      | 1     | 1      | -                   | 42.9             | 7.5        | 70               | 2.1              | 40.8                | 651       | 4.46       |

**Supplementary Table 2: Blastic and non-blastic MCL patients treated with maintenance therapy with rituximab or ofatumumab**

| Patient | Disease         | Response to SCR | Maintenance | Duration (Years) | Response        |
|---------|-----------------|-----------------|-------------|------------------|-----------------|
| 214     | Non-blastic MCL | CR              | Rituximab   | 0.88             | CR              |
| 215     | Non-blastic MCL | PR              | Ofatumumab  | 1.20             | RELAPSE         |
| 231     | Non-blastic MCL | CR              | Rituximab   | 1.80             | RELAPSE         |
| 220     | Non-blastic MCL | CR              | Rituximab   | 1.95             | CR              |
| 217     | Non-blastic MCL | CR              | Rituximab   | 2.01             | CR              |
| 202     | Non-blastic MCL | CR              | Rituximab   | 2.36             | RELAPSE         |
| 201     | Non-blastic MCL | CR              | Rituximab   | 3.12             | CR              |
| 208     | Non-blastic MCL | CR              | Rituximab   | 4.06             | CR              |
| 206     | Non-blastic MCL | CR              | Rituximab   | 4.76             | CR              |
| 1       | Blastic MCL     | PR              | Ofatumumab  | 0.31             | PROGRESSION     |
| 2       | Blastic MCL     | PR              | Ofatumumab  | 2.62             | PROGRESSION     |
| 3       | Blastic MCL     | CR              | Ofatumumab  | 2.34             | CR              |
| 4       | Blastic MCL     | PR              | Ofatumumab  | 0.50             | CR              |
| 6       | Blastic MCL     | CR              | Rituximab   | 0.71             | CR              |
| 7       | Blastic MCL     | CR              | Rituximab   | 0.59             | RELAPSE         |
| 8       | Blastic MCL     | PR              | Ofatumumab  | 0.35             | PROGRESSION     |
| 9       | Blastic MCL     | PR              | Rituximab   | 1.02             | CR THEN RELAPSE |
| 10      | Blastic MCL     | CR              | Rituximab   | 4.05             | RELAPSE         |
| 13      | Blastic MCL     | PR              | Ofatumumab  | 1.49             | CR THEN RELAPSE |

### Supplementary Table 3: Primer sequences

| Taqman primer/probe (Life Technologies) |                                    |
|-----------------------------------------|------------------------------------|
| DUSP1                                   | Hs00610256_g1                      |
| DUSP2                                   | Hs00358879_m1                      |
| p53                                     | Hs01034249_m1                      |
| A/G polymorphism primers                | C_744725_1                         |
| Cyclin D1                               | Hs00765553_m1                      |
| Cyclin D2                               | Hs00153380_m1                      |
| Cyclin D3                               | Hs00236949_m1                      |
| CD20                                    | Hs00254780_m1                      |
| 18S                                     | Hs03928992_g1                      |
| Beta Actin                              | Hs99999903_m1                      |
| RT QPCR Primers (IDT)                   |                                    |
| CEBPB Forward primer                    | CGC CGC CGC CTG CCT TTA AAT        |
| CEBPB Reverse primer                    | TAC GCA GCA GCC AAG CAG TCC G      |
| granzyme B forward primer               | GAG AGC AAG GAG GAA ACA ACA        |
| granzyme B reverse primer               | AAG ATA AGC CAT GTA GGG GCG        |
| perforin forward primer                 | AAGTGA TGT GAGTGGTGG CTG           |
| perforin reverse primer                 | GAATCC CGT ATA GAG AAG CGG C       |
| SOX11 Forward primer                    | CCA GGA CAG AAC CAC CTG ATG        |
| SOX11 Reverse primer                    | GCC TTG GAA AAT ACA CAC TTG TTA AC |
| SOX11 FAM probe                         | TTT AGA GCA GTT TTC AGC ATG A      |

### Supplementary Table 4: Significant *p*-values

| Figure 1F <i>p</i> -values |           |        |      |        |        |        |        |      |
|----------------------------|-----------|--------|------|--------|--------|--------|--------|------|
| Condition                  | Untreated | 250 pM | 1 nM | 4 nM   | 16 nM  | 64 nM  | 250 nM | 1 μM |
| Granta: nanoclad vs. clad  | ns        | n.s.   | n.s. | 0.0058 | 0.0061 | 0.0016 | 0.0003 | n.s. |
| IB4: nanoclad vs. clad     | ns        | n.s.   | n.s. | n.s.   | n.s.   | n.s.   | 0.005  | n.s. |

  

| <i>p</i> -values |                    |           |              |           |             |           |              |           |              |
|------------------|--------------------|-----------|--------------|-----------|-------------|-----------|--------------|-----------|--------------|
| Condition        | Figure 2B          | Figure 2D |              | Figure 2E |             | Figure 2F |              | Figure 2G |              |
|                  | Granta/Granta clad | Patient   | <i>DUSP2</i> | Patient   | <i>TP53</i> | Patient   | <i>DUSP1</i> | Patient   | <i>CEBPB</i> |
| H3               | n.s.               | 5/14      | n.s.         | 5/14      | 0.001       | 23/33     | 0.0013       | 5/14      | 0.0005       |
| H3K27Me3         | 0.0155             | 22/32     | 0.007        | 24/34     | 0.0001      | 90/96     | 0.0014       | 23/33     | n.s.         |
| 5MeC             | n.s.               | 23/33     | n.s.         | 436/437   | 0.0001      | 250/252   | n.s.         | 35/44     | n.s.         |
|                  |                    | 90/96     | 0.0008       | 94/106    | n.s.        | 54/60     | 0.0001       | 103/113   | 0.0043       |
|                  |                    | 434/435   | 0.0006       | 22/32     | n.s.        | 420/426   | n.s.         | 163/171   | n.s.         |
|                  |                    | 436/437   | 0.0064       | 434/435   | 0.0001      | 430/431   | n.s.         | 196/211   | 0.03         |
|                  |                    | 250/252   | n.s.         | 445/446   | n.s.        |           |              | 3/15      | 0.0021       |
|                  |                    | 6/15      | 0.0001       | 23/33     | n.s.        |           |              | 36/46     | n.s.         |
|                  |                    | 54/60     | n.s.         | 35/44     | 0.001       |           |              | 294/325   | n.s.         |
|                  |                    | 420/426   | 0.0001       | 36/46     | 0.0001      |           |              |           |              |
| 430/431          | 0.0001             | 78/83     | n.s.         |           |             |           |              |           |              |
|                  |                    |           |              | 90/101    | 0.0002      |           |              |           |              |

| <i>p</i> -values              |             |             |         |             |             |
|-------------------------------|-------------|-------------|---------|-------------|-------------|
| Condition                     | Figure 3F   | Figure 3G   | Patient | Figure 3H   | Figure 3I   |
|                               | <i>GZMB</i> | <i>PRF1</i> |         | <i>GZMB</i> | <i>PRF1</i> |
| SAHA 1 uM 2 days              | 0.0029      | n.s.        | 215/220 | 0.0001      | 0.0006      |
| Clad 30 nM 2 days             | 0.0178      | n.s.        | 445/446 | n.s.        | n.s.        |
| SAHA 1 uM+Clad 30 nM 2 days   | 0.0006      | 0.0031      | 473/474 | 0.0052      | 0.0029      |
| SAHA 0.5 uM 3 days            | 0.0028      | 0.0042      | 475/476 | n.s.        | n.s.        |
| Clad 15 nM 3 days             | n.s.        | n.s.        | 487/488 | 0.0023      | n.s.        |
| SAHA 0.5 uM+Clad 15 nM 3 days | 0.0052      | 0.0009      | 519/520 | n.s.        | n.s.        |
|                               |             |             | 63/67   | n.s.        | n.s.        |

| <i>p</i> -values |          |           |          |              |              |
|------------------|----------|-----------|----------|--------------|--------------|
| Figure 4E        |          | Figure 4F |          | Figure 4H    |              |
|                  | Pre/Post |           | Pre/Post |              | 353/353 clad |
| <i>CD20</i>      | 0.0068   | H3        | n.s.     | <i>CCND1</i> | 0.0138       |
|                  |          | H3K9Me3   | n.s.     | <i>CCND2</i> | 0.0001       |
|                  |          | H3K27Me3  | 0.0082   | <i>CCND3</i> | 0.0006       |
|                  |          | 5MeC      | 0.0017   | <i>SOX11</i> | 0.0081       |
|                  |          |           |          | <i>CD20</i>  | n.s.         |

| <i>p</i> -values       |                           |  |                        |            |                        |           |
|------------------------|---------------------------|--|------------------------|------------|------------------------|-----------|
| Supplementary Figure 1 |                           |  | Supplementary Figure 3 |            | Supplementary Figure 5 |           |
| condition              | Nanoclad/nanoclad+nano C6 |  | condition              | 353/Jurkat | condition              | post clad |
| 64 pM                  | 0.0112                    |  | 10 nM                  | 0.0268     | H3K4me2                | n.s.      |
| 3.2 nM                 | 0.0294                    |  | 100 nM                 | 0.0008     | H3K9me2                | 0.0001    |
| 16 nM                  | 0.0166                    |  | 1 uM                   | 0.0002     | H3K27me2               | 0.0006    |
| 80 nM                  | n.s.                      |  | 10 uM                  | n.s.       |                        |           |
| 400 nM                 | n.s.                      |  | 100 uM                 | n.s.       |                        |           |
| 2 μM                   | n.s.                      |  |                        |            |                        |           |
